# Supplementary material for: Sunlike White Light-Emitting Diodes Based on Rare-Earth-Free Luminescent Materials
Source: MDPI journal article supplement (doi:10.3390/ma15051680), 2022-02-23
Supplement: s1 [file s1]

# Sunlike White Light-Emitting Diodes Based on Rare-Earth-Free Luminescent Materials

Amador Menéndez-Velázquez \*, Dolores Morales and Ana Belén García-Delgado

Photoactive Materials Research Unit, IDONIAL Technology Center, 33417 Avilés, Spain; dolores.morales@idonial.com (D.M.); ana.delgado@idonial.com (A.B.G.-D.)

\* Correspondence: amador.menendez@idonial.com

## Preliminary Accelerated Aging Testing on the Luminescent Thin Films

Luminescent thin films coated on glass were subjected to accelerated UV radiation to check their photo-stability. The selected films for aging studies are:

- Thin film composed of Coumarin 6 green-emitting converter embedded in a PMMA matrix and coated on glass
- Thin film composed of Lumogen Red red-emitting converter embedded in a PMMA matrix and coated on glass

## UV Aging Procedure

The samples were exposed to ultraviolet (UV) radiation with a wavelength peak of 340 nm during 8 hours at 45 °C. The irradiation intensity is 0.76 W/m<sup>2</sup>.

## Characterization Procedure

Absorption and photoluminescence of the original and aged samples were evaluated.

## Results and Discussion

### a) Coumarin 6 green-emitting converter embedded in a PMMA matrix and coated on glass

Figure 1 shows the absorption and photoluminescent spectra (before and after UV exposure) of a thin film composed of Coumarin 6 green-emitting converter embedded in a PMMA matrix and coated on glass. As shown in Figure 1a, after 8h of UV exposure the absorption decreases a little bit. However, after UV exposure, the photoluminescence (see Figure 1b), increases a little bit. Maybe there is some kind of minimal degradation and the intermediate species shows a higher fluorescence, but more studies need to be done before reaching these conclusions.

**Citation:** Menéndez-Velázquez, A.; Morales, D.; García-Delgado, A.B. Unlike White Light-Emitting Diodes Based on Rare-Earth-Free Luminescent Materials. *Materials* **2022**, *15*, 1680. <https://doi.org/10.3390/ma15051680>

Academic Editor: Hélène Serier-Brault

Received: 31 December 2021

Accepted: 21 February 2022

Published: 23 February 2022

**Publisher's Note:** MDPI stays neutral with regard to jurisdictional claims in published maps and institutional affiliations.

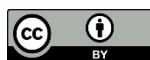

**Copyright:** © 2022 by the authors. Licensee MDPI, Basel, Switzerland. This article is an open access article distributed under the terms and conditions of the Creative Commons Attribution (CC BY) license (<https://creativecommons.org/licenses/by/4.0/>).

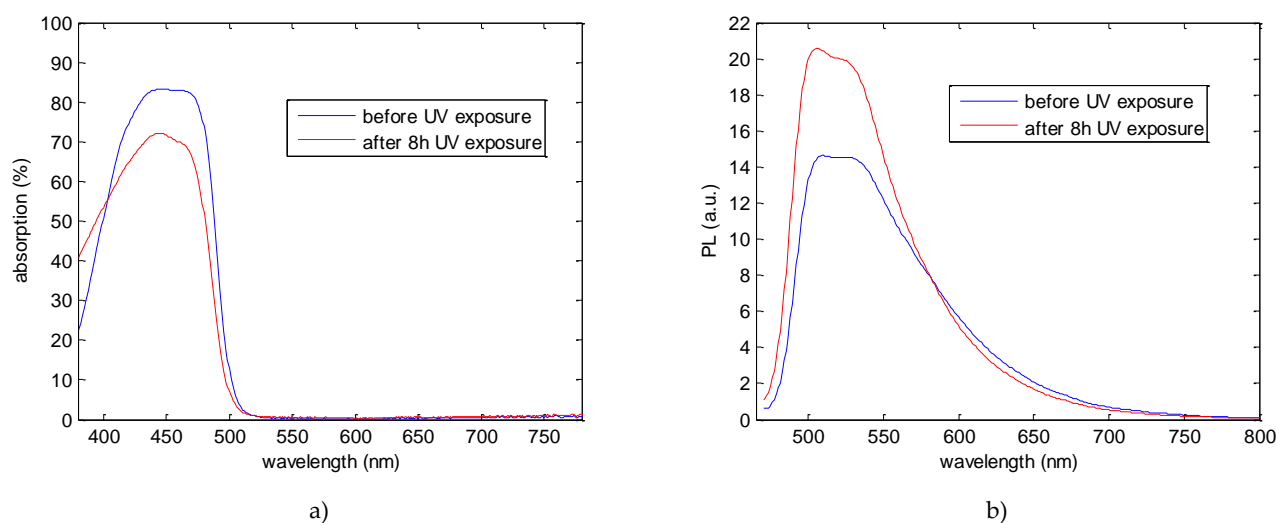

**Figure S1.** Absorption (a) and photoluminescence (b) spectra of Coumarin 6 samples before and after UV exposure.

*b) Lumogen Red red-emitting converter embedded in a PMMA matrix and coated on glass*

Figure S2 shows the absorption and photoluminescent spectra (before and after UV exposure) of a thin film composed of Lumogen Red red-emitting converter embedded in a PMMA matrix and coated on glass. As shown in absorption and photoluminescence spectra, there is not almost any change (before and after UV exposure) in the absorption and photoluminescence properties. Therefore we can conclude that there was no degradation of the Lumogen Red dye when exposed to UV radiation.

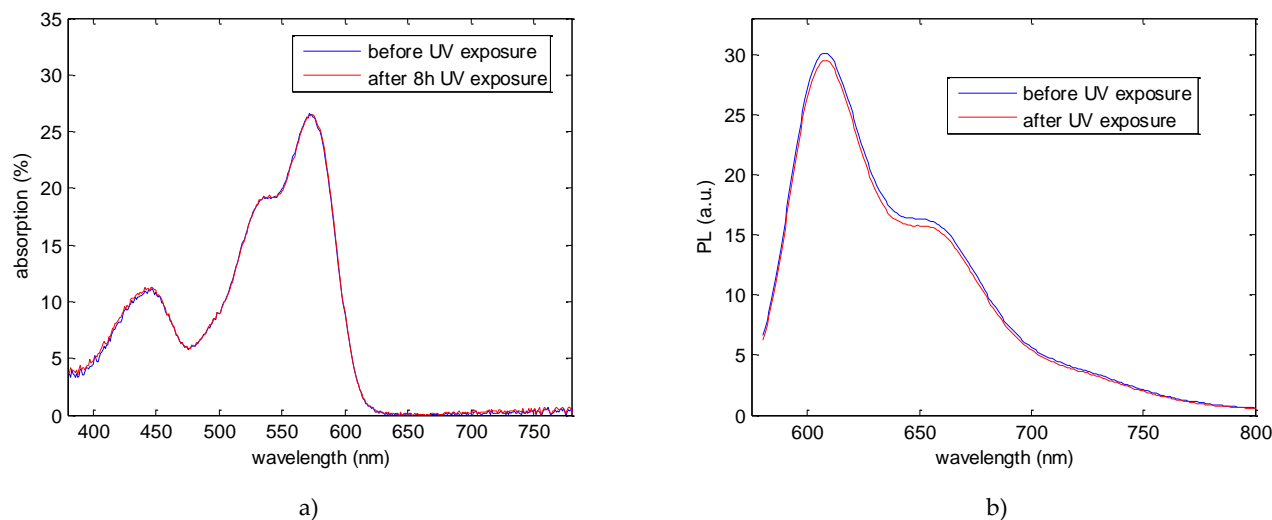

**Figure S2.** Absorption (a) and photoluminescence (b) spectra of Lumogen Red samples before and after UV exposure.

## Conclusions

From this preliminary aging study we can conclude that Lumogen Red exhibits a very good photostability and Coumarin 6 shows a pretty good photo-stability in the manufactured luminescent films. However, further studies are required to check the photo-stability of these organic dyes and reach stronger conclusions.
